# Supplementary material for: Hyunsoonleella sp. HU1-3 Increased the Biomass of Ulva fasciata
Source: Frontiers journal article supplement (doi:10.3389/fmicb.2021.788709), 2022-01-31
Supplement: Data_Sheet_1.pdf [file Data_Sheet_1.pdf]

1 ***Hyunsoonleella* sp. HU1-3**

2 **increased the biomass of**

3 ***Ulva fasciata***

4 **Han Wang<sup>1#</sup>, Ali Mohamed Elyamine<sup>1#</sup>, Yuchun Liu<sup>1</sup>, Wei Liu<sup>1</sup>, Qixuan**  
5 **Chen<sup>1</sup>, Yan Xu<sup>1,2</sup>, Tao Peng<sup>1</sup>, Zhong Hu<sup>1,3\*</sup>**

6 <sup>1</sup>Key Laboratory of Resources and Environmental Microbiology, Department of Biology,  
7 Shantou University, Shantou, Guangdong 515063, R.P of China.

8 <sup>2</sup>Heyuan Polytechnic, Heyuan 517000, Guangdong, China

9 <sup>3</sup>Southern Marine Science and Engineering Guangdong Laboratory, Guangzhou, 511458,  
10 China

11 **#** These authors contributed equally to the work.

12 **\*Correspondence author: Zhong Hu, Email: hzh@stu.edu.cn**

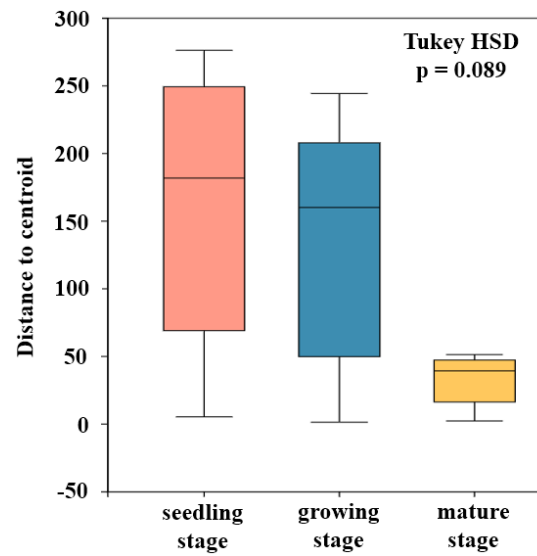

16

17 **Supplemental Figure S1.** The beta diversity of community across different growth stages. The  
 18 difference of surface communities at maturity stage was smaller compared with the seedling stage  
 19 (P = 0.089).

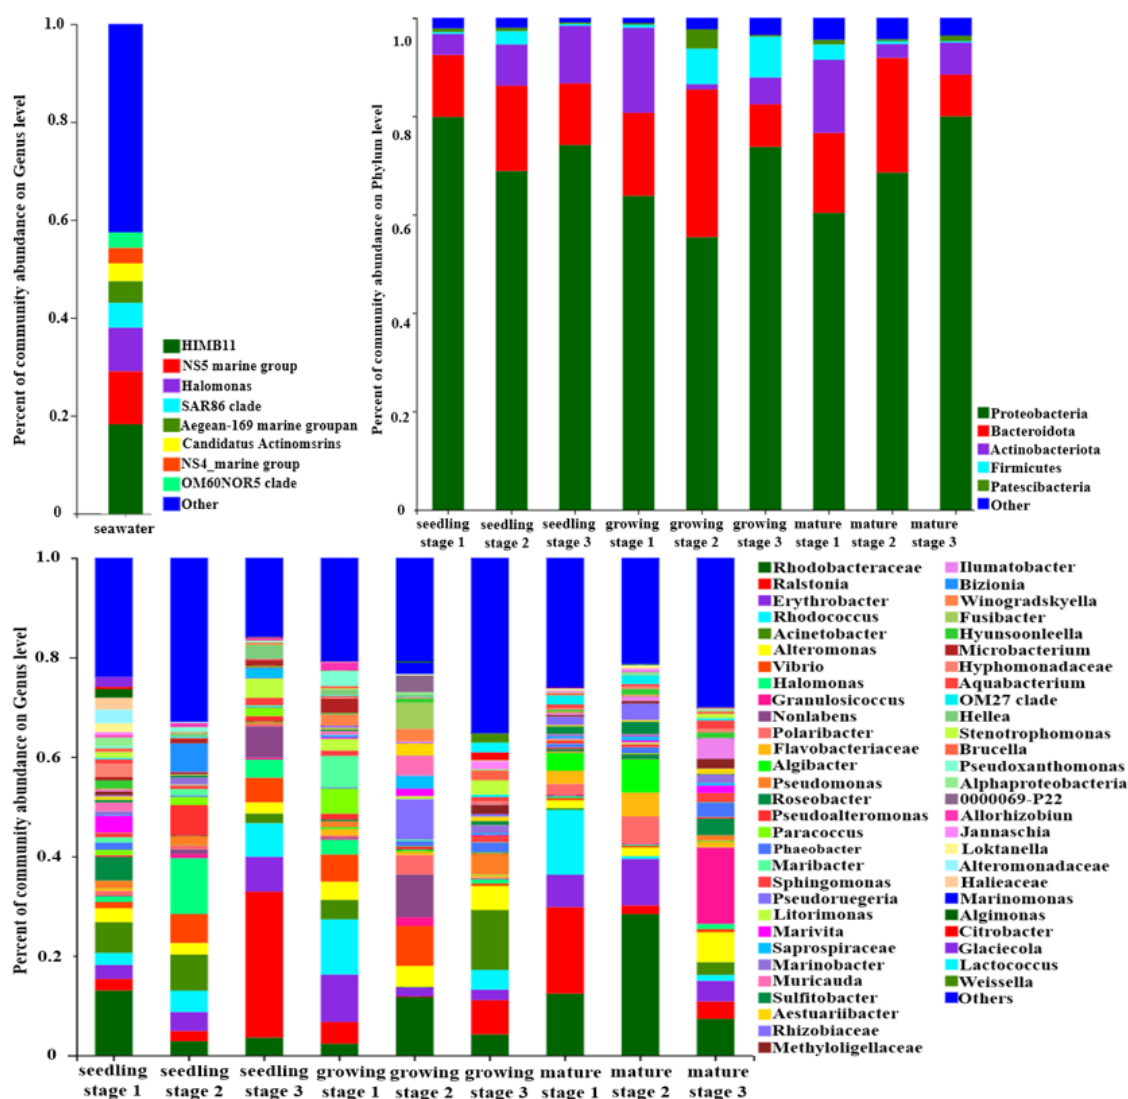

**Supplemental Figure S2.** Changes of relative abundance (%) of bacterial community on the surrounding seawater **(A)** and on the surface of *U. fasciata* at phylum level **(B)** and at the genus level **(C)** during the growth different stage. (Sea water samples in different stages are relatively similar, figure A shows the average value of all sea water samples)

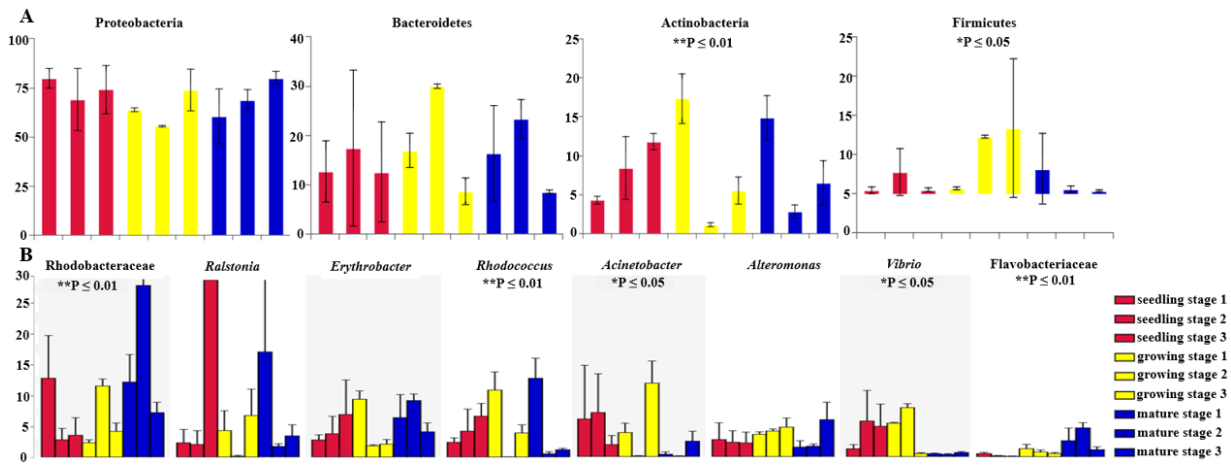

**Supplemental Figure S3.** Used the Kruskal-wallis test to calculate the relative abundance of different bacterial species at phylum and genus levels with different growth stages. (Data are presented as means standard errors (n=3). \*,  $P < 0.05$ , \*\*,  $P < 0.01$ , \*\*\*,  $P < 0.001$ )

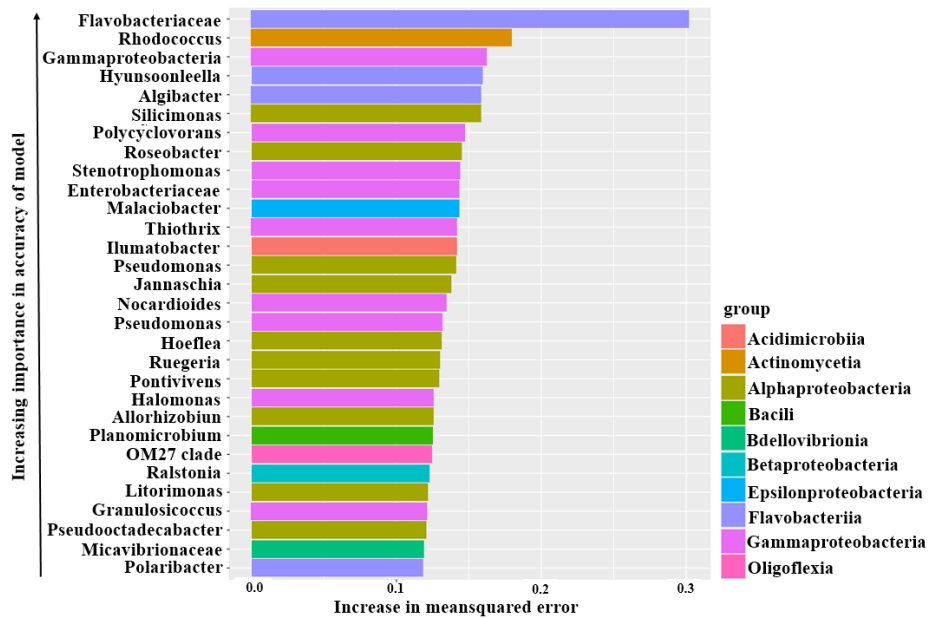

**Supplemental Figure S4.** Biomarkers of *U. fasciata* for horizontal classification of bacterial genera at different growth stage. Using random forest regression method, the relationship between the relative abundance of bacteria in different growth stage and the growth stage of *U. fasciata*

were analyzed. There are 30 biomarker bacteria were identified. The accuracy of the model was influenced by the order of importance of biomarker taxa.

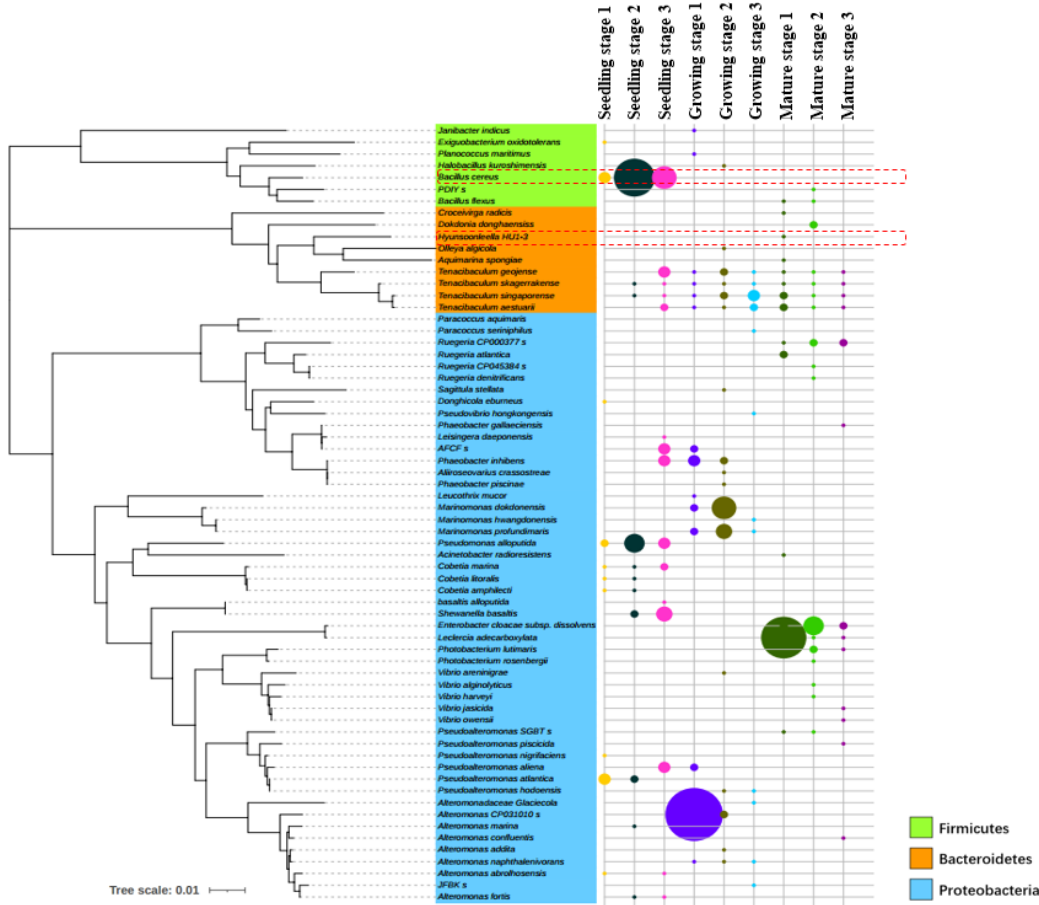

**Supplemental Figure S5.** Evolutionary relationship and number of strains screened from the surface of *U. fasciata* at different growth stages. (Neighbour-joining phylogenetic tree based on 16S rRNA gene sequences showing the positions of strain, scale bar 0.01 substitutions per nucleotide position. The size of the circle is proportional to the number of strains)

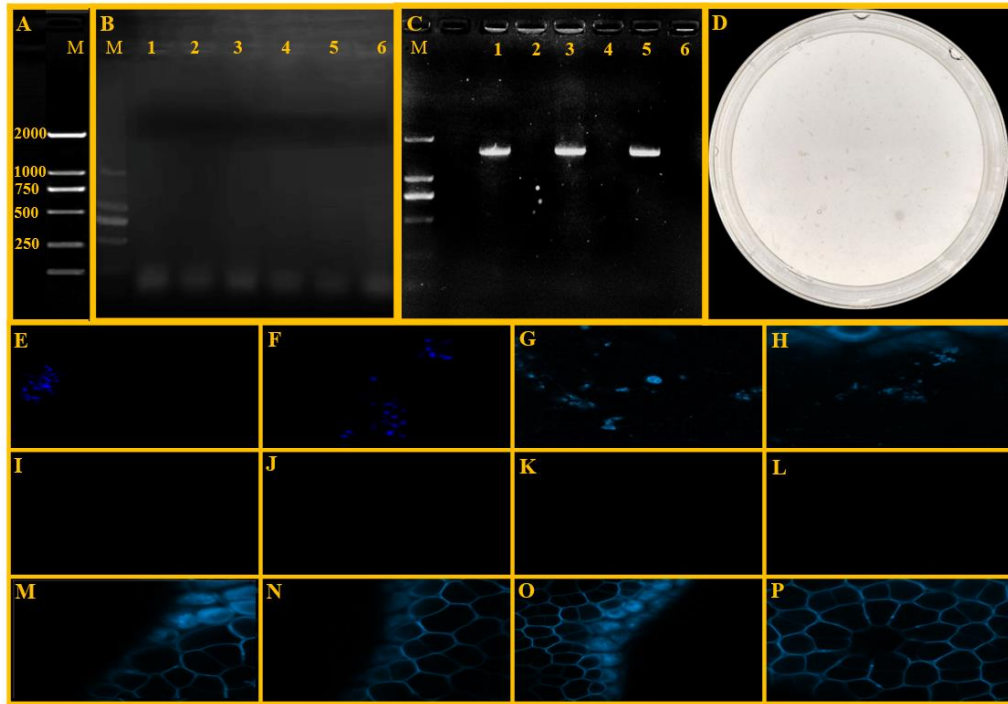

**Supplemental Figure S6.** Aseptic validation of *U. fasciata* (SBR). **(A)** stripe map of bacterial DNA Marker 2000, **(B)** the seawater collected during the last rinse as a template, and the universal primer of bacteria was used to amplify the full length 16S rDNA by PCR (lanes 1-6 are parallel experiments, and no PCR products were obtained at 1500bp, which proved that no bacteria existed.) , **(C)** *U. fasciata* (SBR) was ground into liquid, then this liquid was used as template to complete the amplification of full-length 16S rDNA (lanes 1,3,5 are parallel experiments, PCR products were found at 1500bp which confirming the presence of bacteria inside the *U. fasciata* (SBR)), **(D)** the seawater collected at the time of the last rinse was coated with ocean 2216E plate without bacterial strain growth after one week, **(E-H)** *U. fasciata* was stained with 1% (V/V) DAPI and observed by confocal laser scanning microscope (CLSM) , and large numbers of bacterias were found, **(I-L)** *U. fasciata* (SBR) was stained with 1% (V/V) DAPI and examined by CLSM, there was no bright blue spots be observed which indicating the absence of bacteria, **(M-P)** *U. fasciata* (SBR) was stained with 1% (V/V) DAPI and observed by CLSM, and few bacteria can be found in the intercellular space *Ulva* cells.

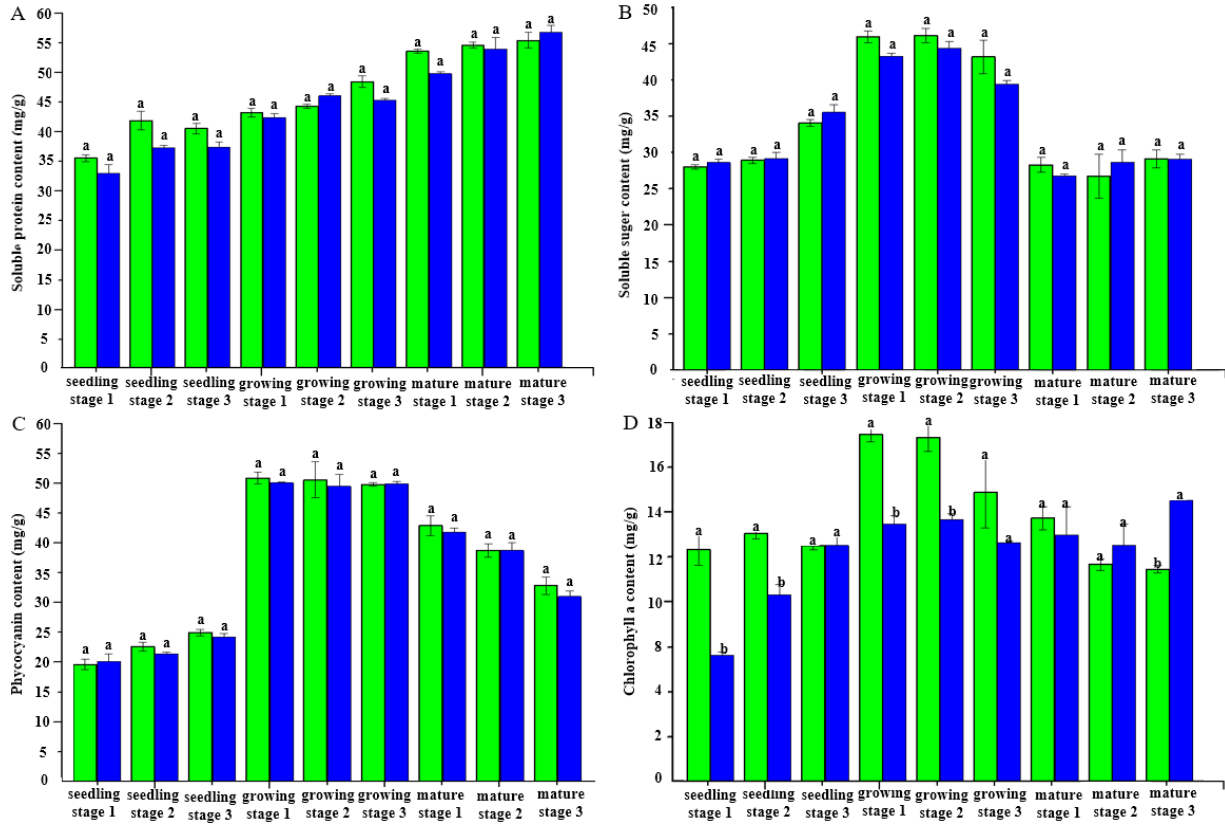

**Supplemental Figure S7.** Comparison of physiological indexes before and after surface sterilization of *U.fasciata* at different growth stages. **(A)** Soluble protein **(B)** Soluble sugar **(C)** Soluble sugar **(D)** Chlorophyll a (The green represents the samples of *U.fasciata* in environment and the blue represents the samples of *U.fasciata* after sterilization. The difference coefficients a and b are the differences between the samples of *U.fasciata* in the same batch)

**Supplemental Table S1:** Different physical environmental parameters of the sampling samples.

| Sample          | Temp (°C)  | DO (ppm)   | pH        | Salinity (‰) |
|-----------------|------------|------------|-----------|--------------|
| seedling stage1 | 22.57±0.03 | 89.63±0.34 | 8±0       | 32.67±0.33   |
| seedling stage2 | 21.5±0.06  | 85.63±3.17 | 8.1±0     | 33±0         |
| seedling stage3 | 20.73±0.15 | 88.53±0.24 | 8.1±0     | 33±0         |
| growing stage1  | 18.2±0.12  | 89.27±0.41 | 8.1±0     | 34±0         |
| growing stage2  | 18.47±0.03 | 87.37±0.48 | 8.13±0.03 | 32±0         |
| growing stage3  | 18.63±0.15 | 88.3±1.06  | 8.07±0.03 | 32.67±0.33   |

|               |            |            |           |            |
|---------------|------------|------------|-----------|------------|
| mature stage1 | 19.47±0.09 | 93.8±0.96  | 8.07±0.03 | 32.67±0.33 |
| mature stage2 | 20.07±0.03 | 83.13±0.29 | 8.07±0.03 | 32.67±0.33 |
| mature stage3 | 22.13±0.09 | 82.57±0.32 | 7.9±0     | 34.67±0.33 |

Supplemental Table S2: Enzymes involved in plant hormone production/regulation in genome of strain *Hyunsoonleella* sp. HU1-3.

| genetic code  | genetic name                                                | gene function        |
|---------------|-------------------------------------------------------------|----------------------|
| JKAMIBLE_0071 | Tryptophan 2,3-dioxygenase                                  | IAA production       |
| JKAMIBLE_0117 | Tryptophan--tRNA ligase                                     |                      |
| JKAMIBLE_0228 | Tryptophan synthase beta chain                              |                      |
| JKAMIBLE_0228 | Tryptophan synthase alpha chain                             |                      |
| JKAMIBLE_0259 | Tryptophan-rich sensory protein                             |                      |
| JKAMIBLE_0032 | N-acetylmuramoyl-L-alanine amidase LytC                     |                      |
| JKAMIBLE_0046 | 2-oxoglutaramate amidase                                    |                      |
| JKAMIBLE_0262 | Mycothiol S-conjugate amidase                               |                      |
| JKAMIBLE_0269 | N-acetylmuramoyl-L-alanine amidase AmiC                     |                      |
| JKAMIBLE_0272 | Bifunctional glutathionylspermidine synthetase/amidase      | Cytokinin production |
| JKAMIBLE_0339 | tRNA dimethylallyltransferase                               |                      |
| JKAMIBLE_0102 | putative tRNA-dihydrouridine synthase                       |                      |
| JKAMIBLE_0217 | tRNA-2-methylthio-N(6)-dimethylallyladenosine synthase      |                      |
| JKAMIBLE_0268 | tRNA N6-adenosine threonylcarbamoyltransferase              |                      |
| JKAMIBLE_0339 | tRNA dimethylallyltransferase                               |                      |
| JKAMIBLE_0137 | 3',5'-cyclic adenosine monophosphate phosphodiesterase CpdA |                      |
| JKAMIBLE_0123 | Cytokinin riboside 5'-monophosphate phosphoribohydrolase    |                      |
| JKAMIBLE_0087 | 3',5'-cyclic adenosine monophosphate phosphodiesterase CpdA |                      |
| JKAMIBLE_0151 | Bifunctional cytochrome P450/NADPH--P450 reductase 1        |                      |
| JKAMIBLE_0093 | NAD(P)-specific glutamate dehydrogenase                     |                      |
| JKAMIBLE_0258 | NAD-specific glutamate dehydrogenase                        |                      |
| JKAMIBLE_0043 | Iron-sulfur cluster carrier protein                         | Iron carrier         |
| JKAMIBLE_0055 | Fumarate reductase iron-sulfur subunit                      |                      |
| JKAMIBLE_0056 | Iron-sulfur cluster insertion protein ErpA                  |                      |
| JKAMIBLE_0086 | Menaquinone reductase, iron-sulfur cluster-binding subunit  |                      |
| JKAMIBLE_0094 | Iron-dependent repressor IdeR                               |                      |
| JKAMIBLE_0327 | Menaquinone reductase, iron-sulfur cluster-binding subunit  |                      |
| JKAMIBLE_0000 | Pyridoxine/pyridoxamine 5'-phosphate oxidase                | Phosphate protein    |
| JKAMIBLE_0001 | Isopentenyl-diphosphate Delta-isomerase                     |                      |
| JKAMIBLE_0002 | Phosphoglycolate phosphatase                                |                      |
| JKAMIBLE_0008 | Carbamoyl-phosphate synthase large chain                    |                      |



|               |                                                                        |
|---------------|------------------------------------------------------------------------|
| JKAMIBLE_0009 | Dodecaprenyl-phosphate galacturonate synthase                          |
| JKAMIBLE_0013 | Mannosylfructose-phosphate synthase                                    |
| JKAMIBLE_0013 | Mannosylfructose-phosphate phosphatase                                 |
| JKAMIBLE_0017 | Aminoalkylphosphonate N-acetyltransferase                              |
| JKAMIBLE_0025 | Phospho-N-acetylmuramoyl-pentapeptide-transferase                      |
| JKAMIBLE_0044 | Alkaline phosphatase synthesis sensor protein PhoR                     |
| JKAMIBLE_0044 | Alkaline phosphatase synthesis transcriptional regulatory protein PhoP |
| JKAMIBLE_0048 | Pyridoxine 5'-phosphate synthase                                       |
| JKAMIBLE_0051 | Thiamine-phosphate synthase                                            |
| JKAMIBLE_0052 | Geranylgeranylglycerol phosphate synthase                              |
| JKAMIBLE_0056 | Thiamine-monophosphate kinase                                          |
| JKAMIBLE_0066 | Phosphoglycolate phosphatase                                           |
| JKAMIBLE_0085 | Sucrose 6(F)-phosphate phosphorylase                                   |
| JKAMIBLE_0103 | Alpha-maltose-1-phosphate synthase                                     |
| JKAMIBLE_0117 | 1-acyl-sn-glycerol-3-phosphate acyltransferase                         |
| JKAMIBLE_0121 | Histidinol-phosphatase                                                 |
| JKAMIBLE_0134 | Glucosamine-6-phosphate deaminase 1                                    |
| JKAMIBLE_0139 | Alkaline phosphatase synthesis transcriptional regulatory protein PhoP |
| JKAMIBLE_0140 | Alkaline phosphatase synthesis sensor protein PhoR                     |
| JKAMIBLE_0154 | L-fucose phosphate aldolase                                            |
| JKAMIBLE_0256 | Alkaline phosphatase PafA                                              |
| JKAMIBLE_0324 | Alkaline phosphatase synthesis transcriptional regulatory protein PhoP |

---
